# Supplementary material
Source: PubMed Central journal article supplement (PMC6334300)
Supplement: NIHMS1000650-supplement-Supporting_Information.pdf [file NIHMS1000650-supplement-Supporting_Information.pdf]

## Supporting Information

### **Disruption of Thioredoxin Reductase 1 Protects Mice from Acute Acetaminophen-Induced Hepatotoxicity through Enhanced Nrf2 Activity**

Andrew D. Patterson<sup>†,‡</sup>, Bradley A. Carlson<sup>||</sup>, Fei Li<sup>†</sup>, Jessica A. Bonzo<sup>†</sup>, Min-Hyuk Yoo<sup>||</sup>, Kristopher W. Krausz<sup>†</sup>, Marcus Conrad<sup>§</sup>, Chi Chen<sup>⊥</sup>, Frank J. Gonzalez<sup>†,\*</sup>, and Dolph L. Hatfield<sup>||,\*</sup>

#### Table of Contents

|                |          |
|----------------|----------|
| Figure S1..... | Page S-2 |
| Figure S2..... | Page S-3 |
| Figure S3..... | Page S-4 |
| Figure S4..... | Page S-5 |
| Figure S5..... | Page S-6 |
| Figure S6..... | Page S-7 |

**Control**

***Txnrd1*<sup>ΔLiv</sup>**

**400 mg/kg (6h)**

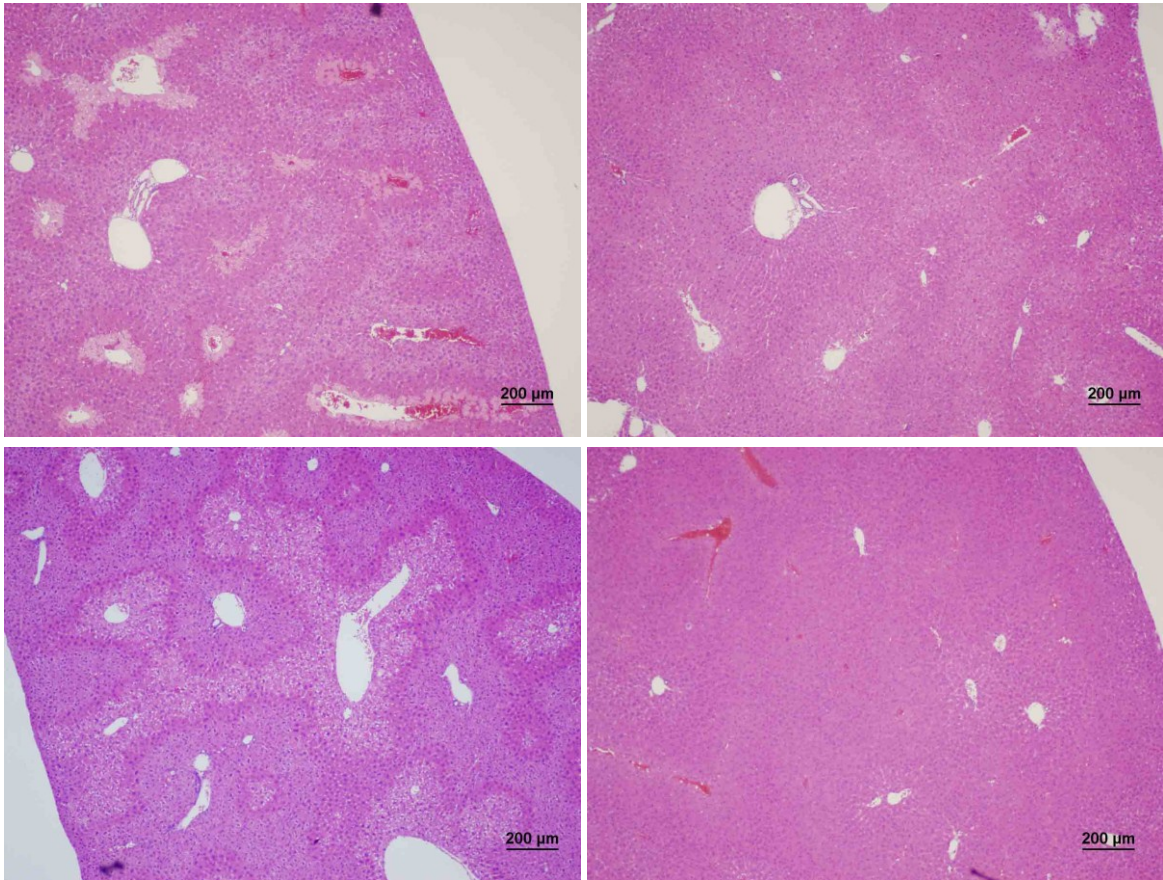

**Figure S1.** Histopathological analysis of additional mouse livers from control (left panel) or *Txnrd1*<sup>ΔLiv</sup> mice (right panel) following H&E staining. Mice received 400 mg/kg of acetaminophen.

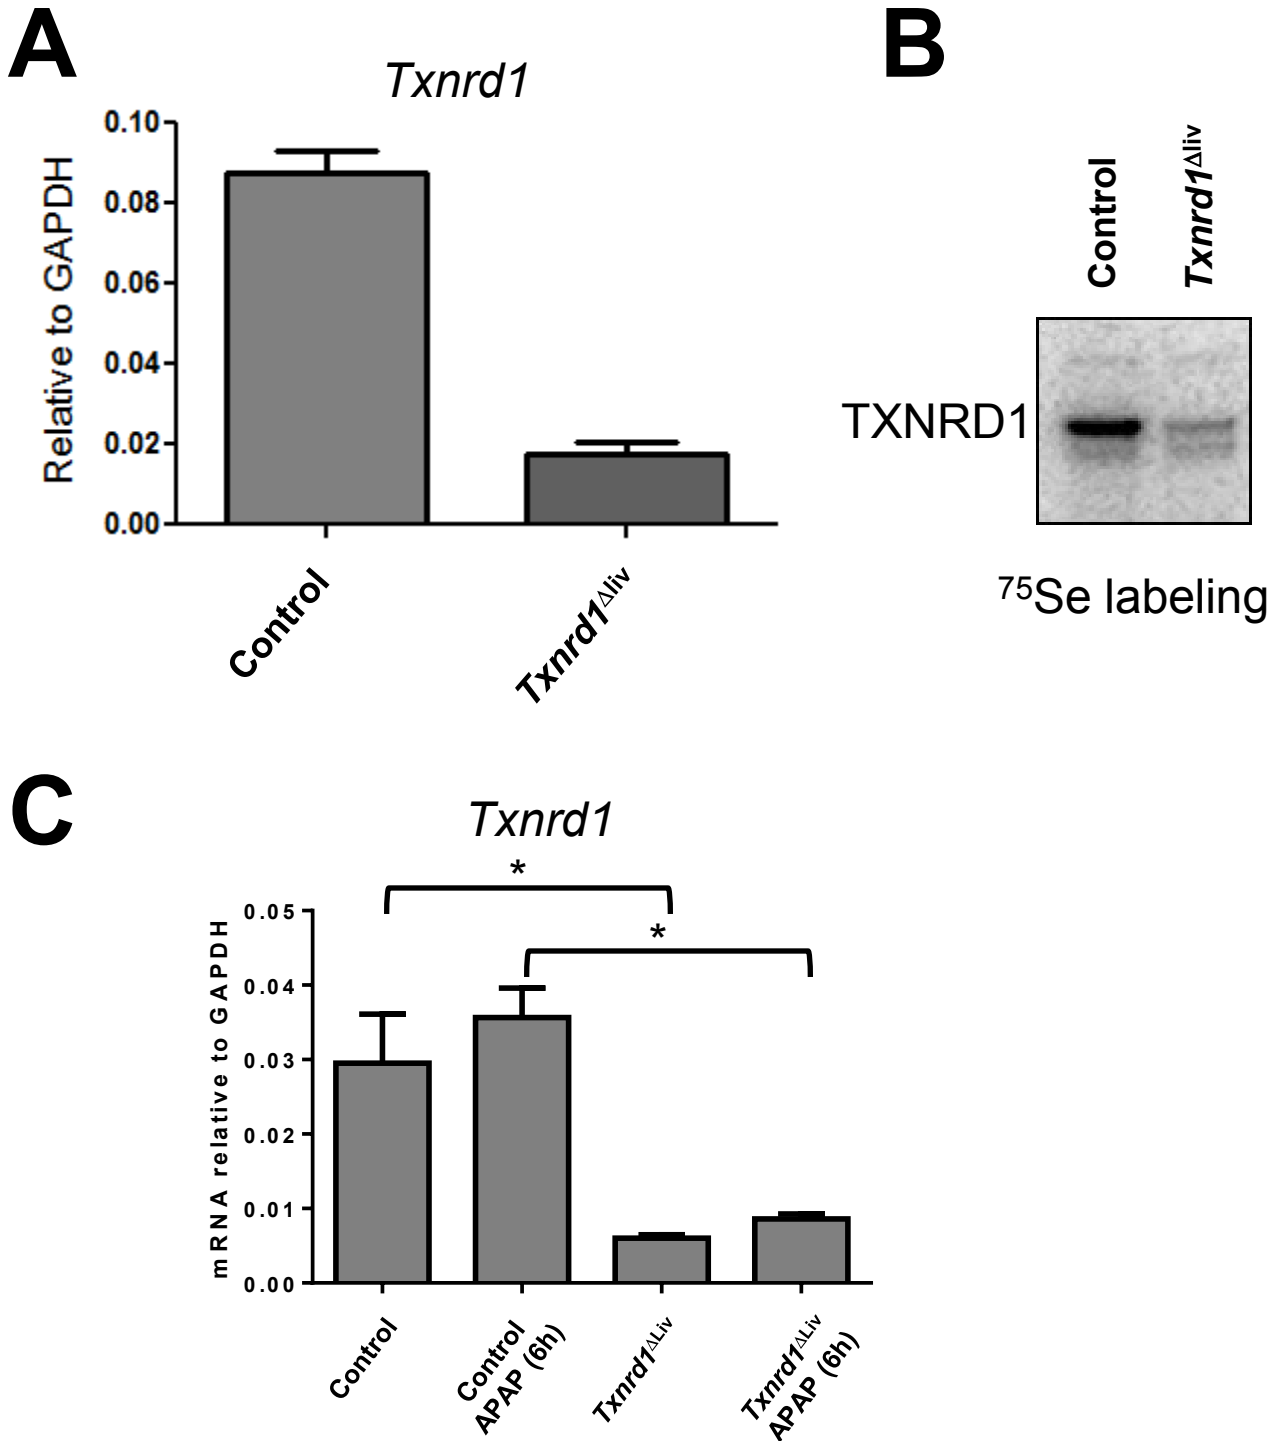

**Figure S2.** Characterization of livers from control and *Txnrd1*<sup>Δliv</sup> mice. (A) The levels of *Txnrd1* mRNA in livers from control and *Txnrd1*<sup>Δliv</sup> mice were determined by QPCR analysis using *gapdh* as an internal control as described in Experimental Procedures. (B) Mice were given I.P. injections of <sup>75</sup>Se, livers harvested after 24 h and the level of TXNRD1 was visualized by Phosphorimager analysis following SDS electrophoresis. (C) Levels of *Txnrd1* in livers from control and *Txnrd1*<sup>Δliv</sup> mice with and without acetaminophen (400 mg/kg) treatment. \**P*<0.05

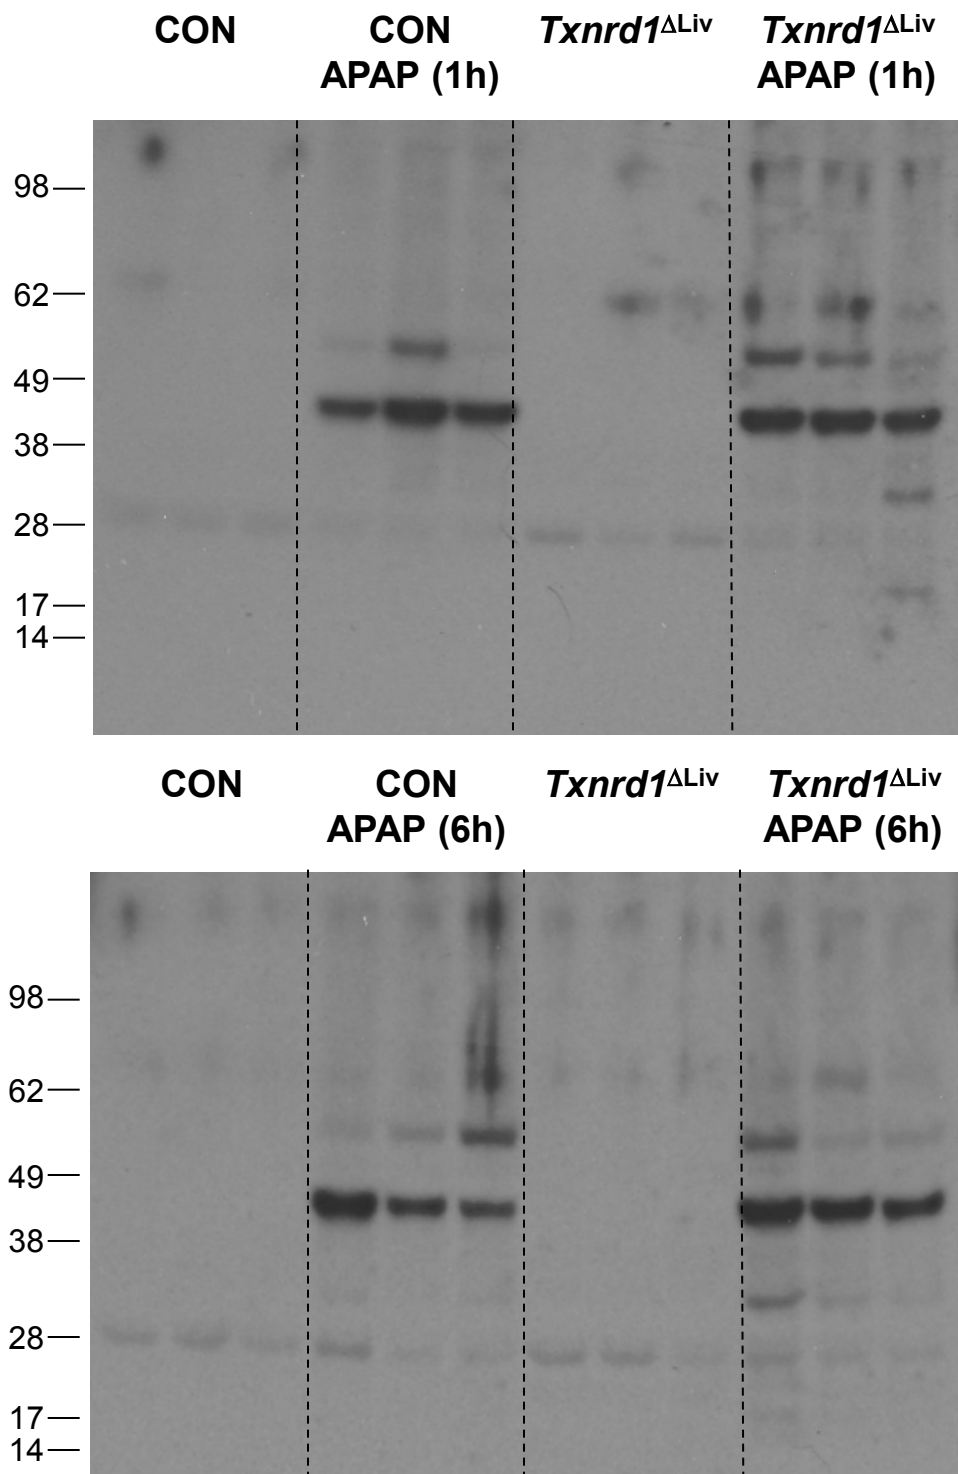

**Figure S3.** Western blot analysis of APAP protein adducts. Control and *Txnrd1*<sup>ΔLiv</sup> mice (n=3) were treated or untreated with a hepatotoxic dose of APAP and liver extracts from 1 h and 6 h after treatment were analyzed by Western blotting of APAP protein adducts.

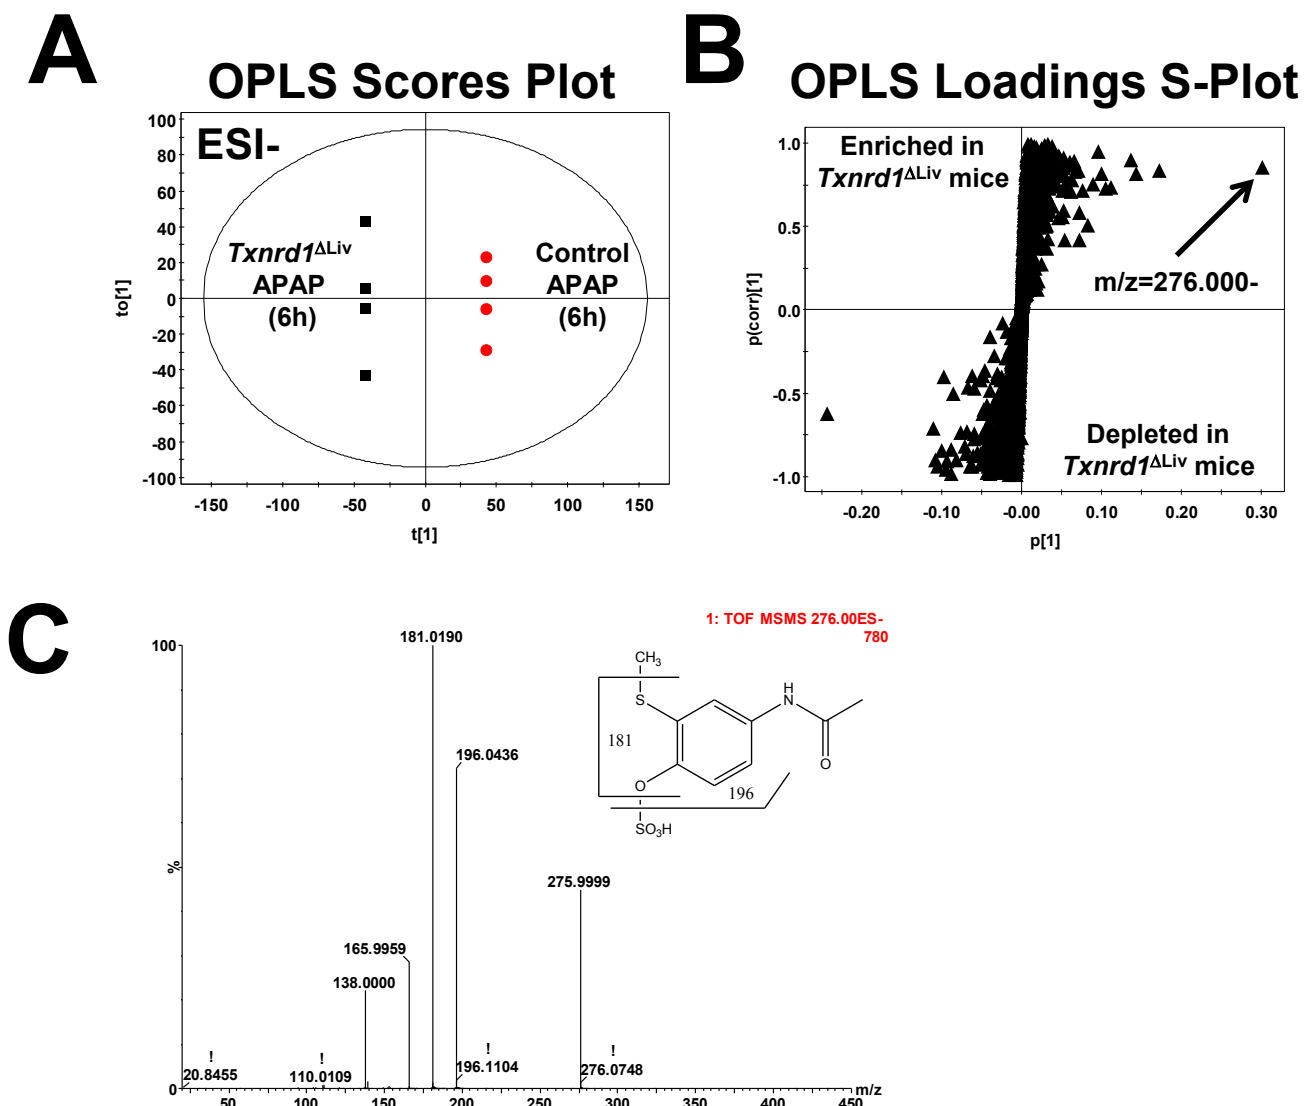

**Figure S4.** Identification of APAP metabolites in urine from control and *Txnrd1*<sup>ΔLiv</sup> mice. Control and *Txnrd1*<sup>ΔLiv</sup> mice were treated with 400 mg/kg APAP for 6 h using UPLC-ESI-QTOFMS-based metabolomics; here operating in ESI- mode. (A) OPLS analysis of ESI- data shows clear separation of control and *Txnrd1*<sup>ΔLiv</sup> mice. The OPLS loadings plot indicates APAP metabolite and fragments ions enriched or depleted in each genotype. (B) OPLS analysis of ESI- data. (C) Tandem MS and the chemical structure of 3-thiomethyl-APAP-sulfate. Tandem MS was conducted by ramping the collision voltage from 5-35 V. Additional information about m/z=276.000- is provided in Table 1.

**A**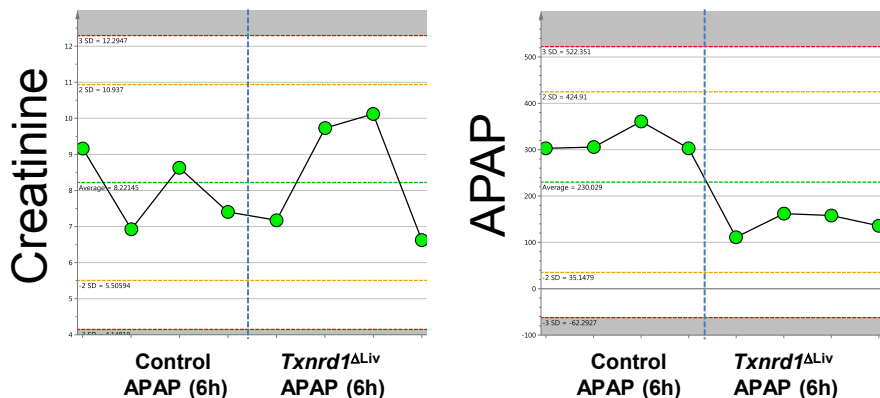**B**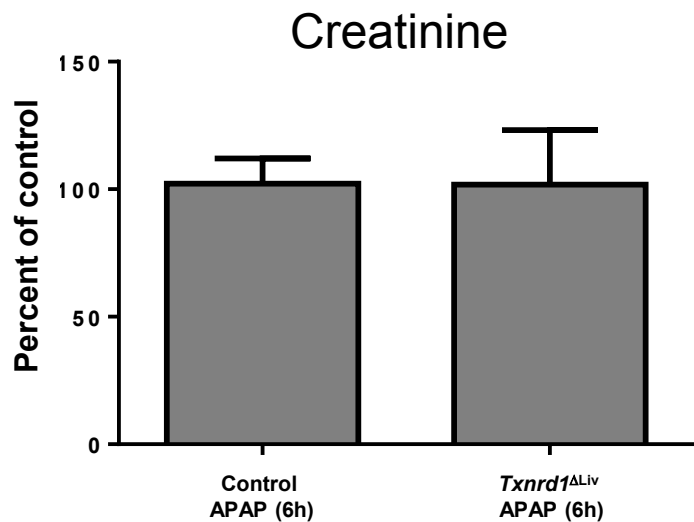

**Figure S5.** Characterization of creatinine in control and *Txnrd1*<sup>ΔLiv</sup> mice. Treatment with 400 mg/kg APAP for 6 h does not impact kidney function in terms of creatinine output. (A) The m/z corresponding to creatinine (m/z = 114.0667+) was extracted from the multivariate data analysis and the levels plotted for each control and *Txnrd1*<sup>ΔLiv</sup> mouse. Levels of free APAP in the urine are shown for comparison. (B) Peak areas corresponding to creatinine were determined from the raw UPLC-ESI-QTOFMS data. No significant difference was observed.

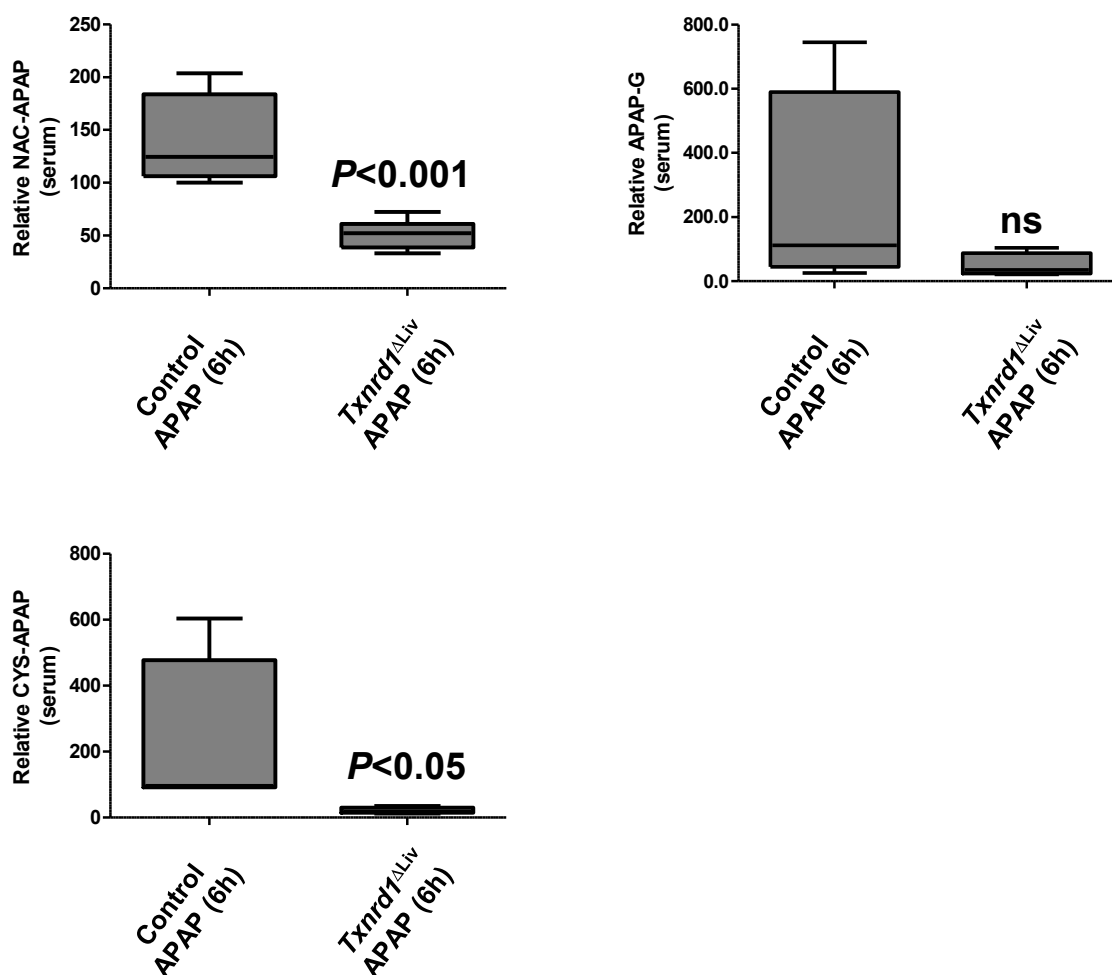

**Figure S6.** Quantitation of APAP metabolites in serum. For serum APAP metabolism analysis, one volume of serum was deproteinated by 20 volumes of 66% aqueous acetonitrile and spun at 14000xg for 10 min at 4C. Conjugates of APAP (Cys-APAP, NAC-APAP, APAP-Glucuronide) in serum of control and *Txnrd1*<sup>ΔLiv</sup> mice were separated by reverse phase chromatography on a 50 x 2.1-mm ACQUITY 1.7  $\mu$ m BEH C<sub>18</sub> column (Waters Corp., Milford, MA) using an ACQUITY ultraperformance liquid chromatography system (Waters Corp) and monitored using a Xevo TQ triplequadrupole mass spectrometry (Waters Corp). The following multiple reaction monitoring transitions were used: Cys-APAP (271→139.9), NAC-APAP (393.1→139.9), APAP-Glucuronide (328.1→152), wherein Chlorpropamide (MRM transition 277→110.9) was used as an internal standard. Serial dilution calibration curves were generated for each metabolite. Results are expressed as micromolar ( $\mu$ M).
